# Supplementary material
Source: Springer Nature journal article supplement (https://www.springermedizin.de/resource/supplementary/13045_2012_256_MOESM4_ESM.pdf/9660936)

**(a) Ikaros**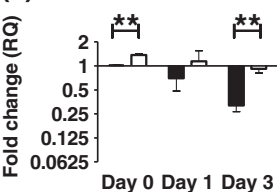**(b) NFE2**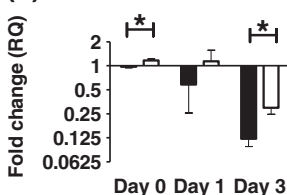**(c) EKLf**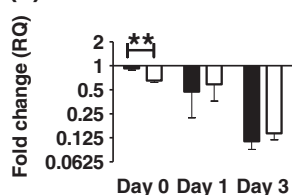**(d) PU.1**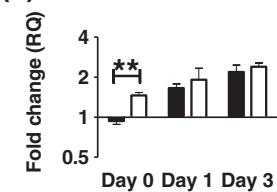**(e) GATA2**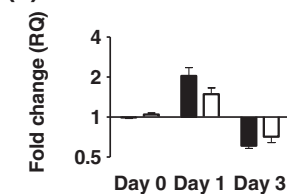**(f) MYB**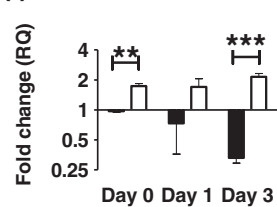**(g) CCND2**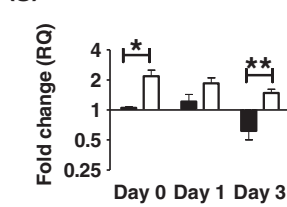**(h) SKI**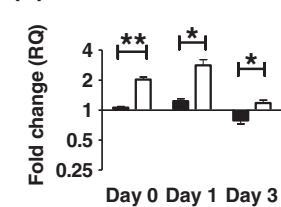

Supplement: MOESM4 [file 9660936]
